# Supplementary material for: A Mixed-Methods Evaluation to Inform the Hawaiʻi Suicide Prevention Strategic Plan
Source: MDPI journal article supplement (doi:10.3390/ijerph21050565), 2024-04-29
Supplement: s1 [file s1]

### Supplementary Figure S1: Survey

The Strategic Plan has 5 strategy areas, aiming to reduce suicide in Hawai‘i 25% by the year 2025.

1. **Hope** - Increase community awareness around suicide prevention and increase statewide capacity for training.
2. **Help** - Promote suicide prevention as a core component of Hawaii’s overall system of care (e.g. intervention, postvention, etc.).
3. **Heal** - Provide survivor support and survivor outreach for those personally touched by suicide, and among those with lived experience.
4. **Research and Evaluation** - Conduct research and evaluation to inform suicide prevention programs, interventions, policies, and overall statewide direction.
5. **Policy and Advocacy** - Ensure policies and protocols set the proper foundation for suicide prevention initiatives.

**1) Over the past five years, how much progress have you seen in each of the 5 Strategies?**

|                       | A lot of progress | Some progress | A little bit of progress | No progress at all |
|-----------------------|-------------------|---------------|--------------------------|--------------------|
| Hope                  |                   |               |                          |                    |
| Help                  |                   |               |                          |                    |
| Heal                  |                   |               |                          |                    |
| Research & Evaluation |                   |               |                          |                    |
| Policy & Advocacy     |                   |               |                          |                    |

**2) Looking forward to the next 3-5 years, please rank the Strategies in order of importance, based on need.**

|                       | 1st priority | 2nd priority | 3rd priority | 4th priority | 5th priority |
|-----------------------|--------------|--------------|--------------|--------------|--------------|
| Hope                  |              |              |              |              |              |
| Help                  |              |              |              |              |              |
| Heal                  |              |              |              |              |              |
| Research & Evaluation |              |              |              |              |              |
| Policy & Advocacy     |              |              |              |              |              |

**3) For the Strategy you ranked as first priority, please suggest a specific activity and/or action step to make progress on this specific Strategy.**

**4) Please reflect on your personal involvement with each Strategy:**

|                       | Already very involved | Assist/support others | Not involved, but would like to be | Not involved, and not my area of focus |
|-----------------------|-----------------------|-----------------------|------------------------------------|----------------------------------------|
| Hope                  |                       |                       |                                    |                                        |
| Help                  |                       |                       |                                    |                                        |
| Heal                  |                       |                       |                                    |                                        |
| Research & Evaluation |                       |                       |                                    |                                        |
| Policy & Advocacy     |                       |                       |                                    |                                        |

**5) For the Strategy(ies) you are involved with, what is your greatest success in making progress towards the Strategic Plan goals?**

**6) For the Strategy(ies) you are involved with, what is your greatest barrier in making progress towards the Strategic Plan goals?**

**7) How would you characterize the overall level of communication within the Taskforce?**

- Excellent
- Good
- Fair
- Poor
- Extremely Poor

**8) How would you characterize the overall level of collaboration within the Taskforce?**

- Collaboration (members belong to one system; consensus is reached on all decisions)
- Coalition (share ideas; all members have a vote in decision-making)
- Coordination (share information and resources; some shared decision-making)
- Cooperation (provide information to each other; decisions are made independently)
- Networking (aware of each other's activities; decisions are made independently)
- None (no awareness or interaction)

**9) Which organization/group do you represent when you participate in the PSHTF? Please check ALL that apply.**

- Survivor (i.e., lost a loved one to suicide, survived a suicide attempt)
- Mental health consumer
- Community/non-profit organization
- Faith--based organization
- State agency (e.g., DOH, DPS, DOE, DHS, DOT, etc.)
- Education -- K--12
- Education -- college/university
- Healthcare organization (e.g., hospital, clinic, private practice, etc.)
- Military/DOD/VA
- Law enforcement
- Business (e.g., private sector)
- Community member

- Other: \_\_\_\_\_

**10) Please select your age group.**

- $\leq 24$
- 25-44
- 45-64
- $\geq 65$

**11) Please select your gender.**

- Male
- Female
- Transgender
- Non-binary/non-conforming
- Other
- Prefer not to respond

**12) What county are you from?**

- Honolulu County
- Kaua'i County
- Maui County
- Hawai'i County

**13) Do you have any final comments?**
