# Supplementary material for: A Mixed-Methods Evaluation to Inform the Hawaiʻi Suicide Prevention Strategic Plan
Source: MDPI journal article supplement (doi:10.3390/ijerph21050565), 2024-04-29
Supplement: s1 [file s1]

**Supplementary Table S1: Taskforce's Five Strategies**

| Goal                                                                                                                                                                                   | Theme                                        | Formal Objective                                                                                                                                                                                                                                                                                   |
|----------------------------------------------------------------------------------------------------------------------------------------------------------------------------------------|----------------------------------------------|----------------------------------------------------------------------------------------------------------------------------------------------------------------------------------------------------------------------------------------------------------------------------------------------------|
| <b>Strategy #1 - HOPE</b>                                                                                                                                                              |                                              |                                                                                                                                                                                                                                                                                                    |
| <b>Goal #1A – Community Awareness</b><br><i>Increase community awareness and communication around suicide prevention as a public health problem that is preventable.</i>               | Communication Strategies                     | 1.1 – Develop a sustained media and communication strategy, incorporating safe messaging guidelines, to raise awareness about suicide prevention.                                                                                                                                                  |
|                                                                                                                                                                                        | Messages                                     | 1.2 – Apply messaging and branding techniques to develop prevention messages that incorporate safe messaging that resonate with Hawai'i's communities.                                                                                                                                             |
|                                                                                                                                                                                        | Media Partners                               | 1.3 – Foster ongoing partnerships with media professionals/outlets.                                                                                                                                                                                                                                |
|                                                                                                                                                                                        | Internet and social media                    | 1.4 – Expand the use of internet and social media, with safe messaging, to promote suicide prevention.                                                                                                                                                                                             |
|                                                                                                                                                                                        | Addressing Stigma                            | 1.5 – Increase knowledge of discrimination and stigma (in the context of mental health and suicide prevention), with marginalized/vulnerable communities, including LGBTQ, those with mental illness, and others.                                                                                  |
| <b>Goal #1B – Training</b><br><i>Increase statewide capacity for training across multiple levels and disciplines, including a focus on cultural humility with diverse populations.</i> | Implementation trainings                     | 1.6 – Increase the number of persons in organizations such as mental health, substance use, education, foster care, juvenile justice programs, health care providers, hospitals, law enforcement, faith-based, community, and workplaces trained to identify and refer people at risk for suicide. |
|                                                                                                                                                                                        | Resources for training                       | 1.6 – Develop resources to increase the number of suicide prevention trainings available, and to expand the menu of evidence-based trainings.                                                                                                                                                      |
|                                                                                                                                                                                        | Dissemination of trainings                   | 1.7 – Promote trainings for individuals and groups statewide.                                                                                                                                                                                                                                      |
| <b>Strategy #2 - HELP</b>                                                                                                                                                              |                                              |                                                                                                                                                                                                                                                                                                    |
| <b>Goal #2</b><br><i>Promote suicide prevention as a core component of Hawai'i's overall system of care.</i>                                                                           | Awareness and training                       | 2.1 – Promote help-seeking across multiple sectors and settings by partnering with State-/county-wide service providers, with emphasis on those that serve individuals at higher risk of suicide.                                                                                                  |
|                                                                                                                                                                                        | Systems Improvement                          | 2.2 – Promote and support adoption and implementation of the Zero Suicide approach within Hawai'i's healthcare systems.                                                                                                                                                                            |
|                                                                                                                                                                                        | Services during and immediately after crisis | 2.3 – Promote the safety and wellbeing of all persons in suicidal crisis.                                                                                                                                                                                                                          |
|                                                                                                                                                                                        | Follow-up and continuity of care             | 2.4 – Implement systems and protocols to enable follow-up and continuity of care.                                                                                                                                                                                                                  |
|                                                                                                                                                                                        | Postvention response                         | 2.5 – Increase capacity of communities and care/support systems to respond effectively to suicide clusters and prevent contagion, within their cultural context, and support implementation with education, training, and consultation.                                                            |
|                                                                                                                                                                                        | Policy and regulatory changes                | 2.6 – Ensure States and county laws facilitate all of the above objectives, and said laws are implemented appropriately.                                                                                                                                                                           |

| Strategy #3 - HEAL                                                                                                                                                                                                     |                                       |                                                                                                                                                                                                                                                                                                               |
|------------------------------------------------------------------------------------------------------------------------------------------------------------------------------------------------------------------------|---------------------------------------|---------------------------------------------------------------------------------------------------------------------------------------------------------------------------------------------------------------------------------------------------------------------------------------------------------------|
| <b>Goal #3A – Survivor Support</b><br><i>Increase Hope, Help, Healing, and Wellbeing among those personally touched by suicide and among those with lived experience.</i>                                              | Support groups                        | 3.1 – Ensure that every Suicide Loss and Lived Experience Survivor has access to a safe, nurturing, and sustainable community infrastructure to share/tell their stories, forgive, heal, survive, and thrive.                                                                                                 |
|                                                                                                                                                                                                                        | Support group facilitators            | 3.2 – Ensure that every Suicide Loss and Lived Experience Survivor has access to a support group with skilled, trained, and culturally competent support group facilitators.                                                                                                                                  |
|                                                                                                                                                                                                                        | Survivor stories                      | 3.3 – Develop, support, maintain and publicize a statewide community-led Suicide Loss and Lived Experience Survivors’ “story-telling bank.”                                                                                                                                                                   |
|                                                                                                                                                                                                                        | Venues                                | 3.4 – Conduct, support and publicize activities and events that provide opportunities for assistance, validation, and comfort and for connecting and sharing stories.                                                                                                                                         |
| <b>GOAL #3B – Survivor Outreach</b><br><i>Increase State and Community capacity to effectively and efficiently respond to individuals and communities affected by suicide and those with mental health challenges.</i> | Outreach program                      | 3.5 – Establish, support, maintain, and publicize a community- based statewide Suicide Outreach Program (SOP) on each island.                                                                                                                                                                                 |
|                                                                                                                                                                                                                        | Centralized information               | 3.6 – Develop, post, and publicize a real-time statewide catalogue of counseling, support groups, community events, and other support services and resources for those affected by suicide. Ensure catalog is available and accessible to service providers, health/medical professionals, and the community. |
| Strategy #4 - RESEARCH AND EVALUATION                                                                                                                                                                                  |                                       |                                                                                                                                                                                                                                                                                                               |
| <b>Goal #4</b><br><i>Conduct and support high-quality research and evaluation to inform suicide prevention programs, interventions, policies, and overall Statewide direction.</i>                                     | Data systems and sharing              | 4.1 - Facilitate the development and integration of suicide prevention data systems                                                                                                                                                                                                                           |
|                                                                                                                                                                                                                        | Evaluation of local programs          | 4.2 – Evaluate existing Hawai’i-based suicide prevention programs, policies, and systems, instituting a “culture of evaluation” to ensure provision of high quality and evidence- based interventions.                                                                                                        |
|                                                                                                                                                                                                                        | Quality Improvement                   | 4.3 – Support service organizations to incorporate organizational evaluation and quality improvement processes.                                                                                                                                                                                               |
|                                                                                                                                                                                                                        | Culture and diversity                 | 4.4 – Support high-quality research and evaluation endeavors which will contribute to our understanding of the role of culture in suicide and suicide prevention.                                                                                                                                             |
|                                                                                                                                                                                                                        | Pursue new opportunities              | 4.5 – Pursue funding and partnerships to expand research opportunities, both local and national.                                                                                                                                                                                                              |
| Strategy #5 - POLICY AND ADVOCACY                                                                                                                                                                                      |                                       |                                                                                                                                                                                                                                                                                                               |
| <b>Goal #5</b><br><i>Ensure policies and protocols set the proper foundation for suicide prevention initiatives.</i>                                                                                                   | General Funding                       | 5.1 – Ensure adequate levels of funding and resources for all aspects of the Strategic Plan.                                                                                                                                                                                                                  |
|                                                                                                                                                                                                                        | Advocacy skills and capacity          | 5.2 – Encourage community members and professionals to engage in advocacy for suicide prevention.                                                                                                                                                                                                             |
|                                                                                                                                                                                                                        | Organizational protocols and policies | 5.3 – Encourage and support agencies and organizations to adopt protocols for suicide prevention, crisis response and management, and postvention.                                                                                                                                                            |
|                                                                                                                                                                                                                        | Codify the Taskforce                  | 5.4 – Institutionalize suicide prevention networks and collaborations, including the Taskforce.                                                                                                                                                                                                               |
